# Supplementary material for: Defining the ligand-dependent proximatome of the sigma 1 receptor
Source: Front Cell Dev Biol. 2023 Jun 7;11:1045759. doi: 10.3389/fcell.2023.1045759 (PMC10284605; doi:10.3389/fcell.2023.1045759)
Supplement: Supplementary file 6 [file Table4.xlsx]

## Sheet: Secretome
Protein IDs	Majority protein IDs	Protein names	Gene names
Q8WVE0	Q8WVE0	Protein-lysine N-methyltransferase N6AMT2	N6AMT2
Q8NBJ4	Q8NBJ4	Golgi membrane protein 1	GOLM1
P16104;Q8IUE6;Q96QV6	P16104;Q8IUE6;Q96QV6	Histone H2AX;Histone H2A type 2-B;Histone H2A type 1-A	H2AFX;HIST2H2AB;HIST1H2AA
P63261	P63261	Actin, cytoplasmic 2;Actin, cytoplasmic 2, N-terminally processed	ACTG1
P62937;Q9Y536;F5H284;P0DN37;P0DN26;A0A0B4J2A2;A0A075B767;A0A075B759	P62937	Peptidyl-prolyl cis-trans isomerase A;Peptidyl-prolyl cis-trans isomerase A, N-terminally processed	PPIA
P33778;Q16778;P23527;P06899;Q8N257;Q6DRA6;Q6DN03	P33778;Q16778;P23527;P06899;Q8N257	Histone H2B type 1-B;Histone H2B type 2-E;Histone H2B type 1-O;Histone H2B type 1-J;Histone H2B type 3-B	HIST1H2BB;HIST2H2BE;HIST1H2BO;HIST1H2BJ;HIST3H2BB
P06733	P06733	Alpha-enolase	ENO1
P62979;P0CG48;P0CG47;P62987	P62979;P0CG48;P0CG47;P62987	Ubiquitin-40S ribosomal protein S27a;Ubiquitin;40S ribosomal protein S27a;Polyubiquitin-C;Ubiquitin;Polyubiquitin-B;Ubiquitin;Ubiquitin-60S ribosomal protein L40;Ubiquitin;60S ribosomal protein L40	RPS27A;UBC;UBB;UBA52
Q16270	Q16270	Insulin-like growth factor-binding protein 7	IGFBP7
Q6FI13;Q16777	Q6FI13;Q16777	Histone H2A type 2-A;Histone H2A type 2-C	HIST2H2AA3;HIST2H2AC
P10909	P10909	Clusterin;Clusterin beta chain;Clusterin alpha chain	CLU
P00338;P07864;Q6ZMR3	P00338	L-lactate dehydrogenase A chain	LDHA
P07195	P07195	L-lactate dehydrogenase B chain	LDHB
P04406;O14556	P04406	Glyceraldehyde-3-phosphate dehydrogenase	GAPDH
P29401	P29401	Transketolase	TKT
P00558;P07205	P00558	Phosphoglycerate kinase 1	PGK1
P11142;P54652	P11142	Heat shock cognate 71 kDa protein	HSPA8
P62805	P62805	Histone H4	HIST1H4A
P10599	P10599	Thioredoxin	TXN
P07737	P07737	Profilin-1	PFN1
P80723	P80723	Brain acid soluble protein 1	BASP1
P04075	P04075	Fructose-bisphosphate aldolase A	ALDOA
P14618;P30613	P14618	Pyruvate kinase PKM	PKM
P63104	P63104	14-3-3 protein zeta/delta	YWHAZ
P23528	P23528	Cofilin-1	CFL1
P68104;Q5VTE0	P68104;Q5VTE0	Elongation factor 1-alpha 1;Putative elongation factor 1-alpha-like 3	EEF1A1;EEF1A1P5
Q01105;P0DME0	Q01105	Protein SET	SET
P23142	P23142	Fibulin-1	FBLN1
Q08380	Q08380	Galectin-3-binding protein	LGALS3BP
Q06830;Q13162	Q06830	Peroxiredoxin-1	PRDX1
P08670;P17661;P41219;P07197;P07196;Q16352	P08670	Vimentin	VIM
P09972	P09972	Fructose-bisphosphate aldolase C	ALDOC
P63241;Q6IS14;Q9GZV4	P63241;Q6IS14	Eukaryotic translation initiation factor 5A-1;Eukaryotic translation initiation factor 5A-1-like	EIF5A;EIF5AL1
P61769	P61769	Beta-2-microglobulin;Beta-2-microglobulin form pI 5.3	B2M
P08238;Q58FF7;Q58FG1	P08238	Heat shock protein HSP 90-beta	HSP90AB1
P62258	P62258	14-3-3 protein epsilon	YWHAE
P15531	P15531	Nucleoside diphosphate kinase A	NME1
P17066;P48741	P17066;P48741	Heat shock 70 kDa protein 6;Putative heat shock 70 kDa protein 7	HSPA6;HSPA7
Q12841	Q12841	Follistatin-related protein 1	FSTL1
P0DMV8;P0DMV9	P0DMV8;P0DMV9	Heat shock 70 kDa protein 1A;Heat shock 70 kDa protein 1B	HSPA1A;HSPA1B
P05783;Q92764;CON__H-INV:HIT000015463;CON__Q92764;CON__Q497I4	P05783	Keratin, type I cytoskeletal 18	KRT18
P10809	P10809	60 kDa heat shock protein, mitochondrial	HSPD1
P06703	P06703	Protein S100-A6	S100A6
Q99497	Q99497	Protein deglycase DJ-1	PARK7
P30101	P30101	Protein disulfide-isomerase A3	PDIA3
Q71U36;P0DPH8;P0DPH7;Q6PEY2	Q71U36;P0DPH8;P0DPH7;Q6PEY2	Tubulin alpha-1A chain;Tubulin alpha-3E chain	TUBA1A;TUBA3E
P16403;P10412;Q02539;P22492	P16403;P10412	Histone H1.2;Histone H1.4	HIST1H1C;HIST1H1E
P0DP25;P0DP24;P0DP23;P27482	P0DP25;P0DP24;P0DP23
Q9H0I3	Q9H0I3	Coiled-coil domain-containing protein 113	CCDC113
P63313	P63313	Thymosin beta-10	TMSB10
Q9P126	Q9P126	C-type lectin domain family 1 member B	CLEC1B
P00441	P00441	Superoxide dismutase [Cu-Zn]	SOD1
Q12805	Q12805	EGF-containing fibulin-like extracellular matrix protein 1	EFEMP1
P07900;Q14568;Q58FG0	P07900	Heat shock protein HSP 90-alpha	HSP90AA1
P68431;Q16695;Q6NXT2	P68431;Q16695	Histone H3.1;Histone H3.1t	HIST1H3A;HIST3H3
P18669;P15259;Q8N0Y7	P18669	Phosphoglycerate mutase 1	PGAM1
P68032;P68133;P62736;P63267	P68032;P68133;P62736;P63267	Actin, alpha cardiac muscle 1;Actin, alpha skeletal muscle;Actin, aortic smooth muscle;Actin, gamma-enteric smooth muscle	ACTC1;ACTA1;ACTA2;ACTG2
P62266	P62266	40S ribosomal protein S23	RPS23
P23284	P23284	Peptidyl-prolyl cis-trans isomerase B	PPIB
P19338	P19338	Nucleolin	NCL
P22692	P22692	Insulin-like growth factor-binding protein 4	IGFBP4
P01033	P01033	Metalloproteinase inhibitor 1	TIMP1
O95994	O95994	Anterior gradient protein 2 homolog	AGR2
Q8NBP7	Q8NBP7	Proprotein convertase subtilisin/kexin type 9	PCSK9
P62328	P62328	Thymosin beta-4;Hematopoietic system regulatory peptide	TMSB4X
P06454	P06454	Prothymosin alpha;Prothymosin alpha, N-terminally processed;Thymosin alpha-1	PTMA
P60174	P60174	Triosephosphate isomerase	TPI1
P07711	P07711	Cathepsin L1;Cathepsin L1 heavy chain;Cathepsin L1 light chain	CTSL
P84243	P84243	Histone H3.3	H3F3A
P27797	P27797	Calreticulin	CALR
Q15582	Q15582	Transforming growth factor-beta-induced protein ig-h3	TGFBI
P67936	P67936	Tropomyosin alpha-4 chain	TPM4
P11021	P11021	78 kDa glucose-regulated protein	HSPA5
P61981	P61981	14-3-3 protein gamma;14-3-3 protein gamma, N-terminally processed	YWHAG
P06744;Q8N196	P06744	Glucose-6-phosphate isomerase	GPI
P53634	P53634	Dipeptidyl peptidase 1;Dipeptidyl peptidase 1 exclusion domain chain;Dipeptidyl peptidase 1 heavy chain;Dipeptidyl peptidase 1 light chain	CTSC
P30086	P30086	Phosphatidylethanolamine-binding protein 1;Hippocampal cholinergic neurostimulating peptide	PEBP1
P07237	P07237	Protein disulfide-isomerase	P4HB
P32119	P32119	Peroxiredoxin-2	PRDX2
P01034	P01034	Cystatin-C	CST3
P02545	P02545	Prelamin-A/C;Lamin-A/C	LMNA
P62826	P62826	GTP-binding nuclear protein Ran	RAN
P55072	P55072	Transitional endoplasmic reticulum ATPase	VCP
P13639	P13639	Elongation factor 2	EEF2
P68371	P68371	Tubulin beta-4B chain	TUBB4B
P09211	P09211	Glutathione S-transferase P	GSTP1
P05387	P05387	60S acidic ribosomal protein P2	RPLP2
P20908	P20908	Collagen alpha-1(V) chain	COL5A1
P31949	P31949	Protein S100-A11;Protein S100-A11, N-terminally processed	S100A11
Q8WYP3	Q8WYP3	Ras and Rab interactor 2	RIN2
P14174	P14174	Macrophage migration inhibitory factor	MIF
P62263	P62263	40S ribosomal protein S14	RPS14
Q9H4F8	Q9H4F8	SPARC-related modular calcium-binding protein 1	SMOC1
P09429;B2RPK0	P09429	High mobility group protein B1	HMGB1
P21291	P21291	Cysteine and glycine-rich protein 1	CSRP1
Q02818	Q02818	Nucleobindin-1	NUCB1
P68363;A6NHL2;Q9H853	P68363	Tubulin alpha-1B chain	TUBA1B
Q14103	Q14103	Heterogeneous nuclear ribonucleoprotein D0	HNRNPD
P16035	P16035	Metalloproteinase inhibitor 2	TIMP2
Q7LFX5	Q7LFX5	Carbohydrate sulfotransferase 15	CHST15
P21333	P21333	Filamin-A	FLNA
B1ANS9	B1ANS9	WD repeat-containing protein 64	WDR64
P07602	P07602	Prosaposin;Saposin-A;Saposin-B-Val;Saposin-B;Saposin-C;Saposin-D	PSAP
P39687;O43423;O95626	P39687	Acidic leucine-rich nuclear phosphoprotein 32 family member A	ANP32A
P26038	P26038	Moesin	MSN
O43707;Q9H254	O43707	Alpha-actinin-4	ACTN4
P31946	P31946	14-3-3 protein beta/alpha;14-3-3 protein beta/alpha, N-terminally processed	YWHAB
P24534	P24534	Elongation factor 1-beta	EEF1B2
O75083	O75083	WD repeat-containing protein 1	WDR1
P05386	P05386	60S acidic ribosomal protein P1	RPLP1
Q9UBR2	Q9UBR2	Cathepsin Z	CTSZ
O94985	O94985	Calsyntenin-1;Soluble Alc-alpha;CTF1-alpha	CLSTN1
P52209	P52209	6-phosphogluconate dehydrogenase, decarboxylating	PGD
P10619	P10619	Lysosomal protective protein;Lysosomal protective protein 32 kDa chain;Lysosomal protective protein 20 kDa chain	CTSA
Q9BVA1	Q9BVA1	Tubulin beta-2B chain	TUBB2B
P30041	P30041	Peroxiredoxin-6	PRDX6
P62701;Q8TD47;P22090	P62701	40S ribosomal protein S4, X isoform	RPS4X
P61604	P61604	10 kDa heat shock protein, mitochondrial	HSPE1
P63244	P63244	Guanine nucleotide-binding protein subunit beta-2-like 1;Guanine nucleotide-binding protein subunit beta-2-like 1, N-terminally processed	GNB2L1
P20962	P20962	Parathymosin	PTMS
P52565	P52565	Rho GDP-dissociation inhibitor 1	ARHGDIA
P40925	P40925	Malate dehydrogenase, cytoplasmic	MDH1
P27348	P27348	14-3-3 protein theta	YWHAQ
P04792	P04792	Heat shock protein beta-1	HSPB1
Q58FF6	Q58FF6	Putative heat shock protein HSP 90-beta 4	HSP90AB4P
P35555	P35555	Fibrillin-1	FBN1
Q71DI3	Q71DI3	Histone H3.2	HIST2H3A
P43246	P43246	DNA mismatch repair protein Msh2	MSH2
Q9BRK5	Q9BRK5	45 kDa calcium-binding protein	SDF4
P07996;P35442	P07996	Thrombospondin-1	THBS1
P26641	P26641	Elongation factor 1-gamma	EEF1G
P22626	P22626	Heterogeneous nuclear ribonucleoproteins A2/B1	HNRNPA2B1
Q14118	Q14118	Dystroglycan;Alpha-dystroglycan;Beta-dystroglycan	DAG1
Q09028	Q09028	Histone-binding protein RBBP4	RBBP4
P39059	P39059	Collagen alpha-1(XV) chain;Restin;Restin-2;Restin-3;Restin-4	COL15A1
P61956;P55854;Q6EEV6	P61956;P55854;Q6EEV6	Small ubiquitin-related modifier 2;Small ubiquitin-related modifier 3;Small ubiquitin-related modifier 4	SUMO2;SUMO3;SUMO4
P31947	P31947	14-3-3 protein sigma	SFN
A4UGR9	A4UGR9	Xin actin-binding repeat-containing protein 2	XIRP2
P25398	P25398	40S ribosomal protein S12	RPS12
O00299	O00299	Chloride intracellular channel protein 1	CLIC1
P37802	P37802	Transgelin-2	TAGLN2
P62081	P62081	40S ribosomal protein S7	RPS7
P62857	P62857	40S ribosomal protein S28	RPS28
Q01469;A8MUU1	Q01469	Fatty acid-binding protein, epidermal	FABP5
P28072	P28072	Proteasome subunit beta type-6	PSMB6
P16949	P16949	Stathmin	STMN1
O43852	O43852	Calumenin	CALU
P84090	P84090	Enhancer of rudimentary homolog	ERH
P32969	P32969	60S ribosomal protein L9	RPL9
Q9NZ53	Q9NZ53	Podocalyxin-like protein 2	PODXL2
P14625;Q58FF3	P14625	Endoplasmin	HSP90B1
O14818;Q8TAA3	O14818	Proteasome subunit alpha type-7	PSMA7
Q9UQ80	Q9UQ80	Proliferation-associated protein 2G4	PA2G4
Q16658	Q16658	Fascin	FSCN1
O00622	O00622	Protein CYR61	CYR61
P50897	P50897	Palmitoyl-protein thioesterase 1	PPT1
P98160	P98160	Basement membrane-specific heparan sulfate proteoglycan core protein;Endorepellin;LG3 peptide	HSPG2
P30050	P30050	60S ribosomal protein L12	RPL12
Q00610;P53675	Q00610	Clathrin heavy chain 1	CLTC
P08865	P08865	40S ribosomal protein SA	RPSA
P15291	P15291	Beta-1,4-galactosyltransferase 1;Lactose synthase A protein;N-acetyllactosamine synthase;Beta-N-acetylglucosaminylglycopeptide beta-1,4-galactosyltransferase;Beta-N-acetylglucosaminyl-glycolipid beta-1,4-galactosyltransferase;Processed beta-1,4-galactosyltransferase 1	B4GALT1
P51858	P51858	Hepatoma-derived growth factor	HDGF
P40926	P40926	Malate dehydrogenase, mitochondrial	MDH2
P50395	P50395	Rab GDP dissociation inhibitor beta	GDI2
P25787	P25787	Proteasome subunit alpha type-2	PSMA2
Q9BTY2	Q9BTY2	Plasma alpha-L-fucosidase	FUCA2
P17096	P17096	High mobility group protein HMG-I/HMG-Y	HMGA1
P19022	P19022	Cadherin-2	CDH2
P29692	P29692	Elongation factor 1-delta	EEF1D
Q7L2H7	Q7L2H7	Eukaryotic translation initiation factor 3 subunit M	EIF3M
P60709	P60709	Actin, cytoplasmic 1;Actin, cytoplasmic 1, N-terminally processed	ACTB
P09382	P09382	Galectin-1	LGALS1
P55209	P55209	Nucleosome assembly protein 1-like 1	NAP1L1
P62906	P62906	60S ribosomal protein L10a	RPL10A
P06753	P06753	Tropomyosin alpha-3 chain	TPM3
P01023	P01023	Alpha-2-macroglobulin	A2M
P37840	P37840	Alpha-synuclein	SNCA
P13797;P13796	P13797	Plastin-3	PLS3
P27695	P27695	DNA-(apurinic or apyrimidinic site) lyase;DNA-(apurinic or apyrimidinic site) lyase, mitochondrial	APEX1
P15880	P15880	40S ribosomal protein S2	RPS2
Q15113	Q15113	Procollagen C-endopeptidase enhancer 1	PCOLCE
P18206	P18206	Vinculin	VCL
P67809;Q9Y2T7	P67809	Nuclease-sensitive element-binding protein 1	YBX1
P34932	P34932	Heat shock 70 kDa protein 4	HSPA4
Q92626	Q92626	Peroxidasin homolog	PXDN
P26639;A2RTX5	P26639	Threonine--tRNA ligase, cytoplasmic	TARS
P00492	P00492	Hypoxanthine-guanine phosphoribosyltransferase	HPRT1
P23396	P23396	40S ribosomal protein S3	RPS3
P13010	P13010	X-ray repair cross-complementing protein 5	XRCC5
Q16881;Q9NNW7	Q16881	Thioredoxin reductase 1, cytoplasmic	TXNRD1
Q07020	Q07020	60S ribosomal protein L18	RPL18
P35241	P35241	Radixin	RDX
P12277	P12277	Creatine kinase B-type	CKB
Q13838;O00148	Q13838	Spliceosome RNA helicase DDX39B	DDX39B
Q13185;P45973	Q13185	Chromobox protein homolog 3	CBX3
O00391	O00391	Sulfhydryl oxidase 1	QSOX1
P61247	P61247	40S ribosomal protein S3a	RPS3A
Q15149	Q15149	Plectin	PLEC
P18621	P18621	60S ribosomal protein L17	RPL17
O00410;O60518	O00410	Importin-5	IPO5
P20618	P20618	Proteasome subunit beta type-1	PSMB1
P35579;P35749	P35579	Myosin-9	MYH9
P78527	P78527	DNA-dependent protein kinase catalytic subunit	PRKDC
P07686	P07686	Beta-hexosaminidase subunit beta;Beta-hexosaminidase subunit beta chain B;Beta-hexosaminidase subunit beta chain A	HEXB
Q99832	Q99832	T-complex protein 1 subunit eta	CCT7
P49327	P49327	Fatty acid synthase;[Acyl-carrier-protein] S-acetyltransferase;[Acyl-carrier-protein] S-malonyltransferase;3-oxoacyl-[acyl-carrier-protein] synthase;3-oxoacyl-[acyl-carrier-protein] reductase;3-hydroxyacyl-[acyl-carrier-protein] dehydratase;Enoyl-[acyl-carrier-protein] reductase;Oleoyl-[acyl-carrier-protein] hydrolase	FASN
P42330;P17516	P42330	Aldo-keto reductase family 1 member C3	AKR1C3
P62241	P62241	40S ribosomal protein S8	RPS8
Q14240	Q14240	Eukaryotic initiation factor 4A-II;Eukaryotic initiation factor 4A-II, N-terminally processed	EIF4A2
Q14697	Q14697	Neutral alpha-glucosidase AB	GANAB
P06748	P06748	Nucleophosmin	NPM1
P31948	P31948	Stress-induced-phosphoprotein 1	STIP1
P23526	P23526	Adenosylhomocysteinase	AHCY
P09651;Q32P51	P09651;Q32P51	Heterogeneous nuclear ribonucleoprotein A1;Heterogeneous nuclear ribonucleoprotein A1, N-terminally processed;Heterogeneous nuclear ribonucleoprotein A1-like 2	HNRNPA1;HNRNPA1L2
P26583	P26583	High mobility group protein B2	HMGB2
Q16531	Q16531	DNA damage-binding protein 1	DDB1
P60900	P60900	Proteasome subunit alpha type-6	PSMA6
Q9BRA2	Q9BRA2	Thioredoxin domain-containing protein 17	TXNDC17
P13497	P13497	Bone morphogenetic protein 1	BMP1
O00468	O00468	Agrin;Agrin N-terminal 110 kDa subunit;Agrin C-terminal 110 kDa subunit;Agrin C-terminal 90 kDa fragment;Agrin C-terminal 22 kDa fragment	AGRN
O43286	O43286	Beta-1,4-galactosyltransferase 5	B4GALT5
Q14019	Q14019	Coactosin-like protein	COTL1
P62753	P62753	40S ribosomal protein S6	RPS6
P62942	P62942	Peptidyl-prolyl cis-trans isomerase FKBP1A	FKBP1A
P60842	P60842	Eukaryotic initiation factor 4A-I	EIF4A1
O75347	O75347	Tubulin-specific chaperone A	TBCA
P14314	P14314	Glucosidase 2 subunit beta	PRKCSH
P60660;P14649	P60660	Myosin light polypeptide 6	MYL6
P07437	P07437	Tubulin beta chain	TUBB
P22392;O60361	P22392;O60361	Nucleoside diphosphate kinase B;Putative nucleoside diphosphate kinase	NME2;NME2P1
Q02809	Q02809	Procollagen-lysine,2-oxoglutarate 5-dioxygenase 1	PLOD1
Q9UBX5	Q9UBX5	Fibulin-5	FBLN5
Q15293	Q15293	Reticulocalbin-1	RCN1
P14324	P14324	Farnesyl pyrophosphate synthase	FDPS
Q92688	Q92688	Acidic leucine-rich nuclear phosphoprotein 32 family member B	ANP32B
P16070	P16070	CD44 antigen	CD44
P58546	P58546	Myotrophin	MTPN
P46777	P46777	60S ribosomal protein L5	RPL5
O75367;Q9P0M6	O75367	Core histone macro-H2A.1	H2AFY
P31939	P31939	Bifunctional purine biosynthesis protein PURH;Phosphoribosylaminoimidazolecarboxamide formyltransferase;IMP cyclohydrolase	ATIC
P07339	P07339	Cathepsin D;Cathepsin D light chain;Cathepsin D heavy chain	CTSD
Q15046	Q15046	Lysine--tRNA ligase	KARS
O14979	O14979	Heterogeneous nuclear ribonucleoprotein D-like	HNRNPDL
Q71UI9;P0C0S5	Q71UI9;P0C0S5	Histone H2A.V;Histone H2A.Z	H2AFV;H2AFZ
P49773	P49773	Histidine triad nucleotide-binding protein 1	HINT1
P25789	P25789	Proteasome subunit alpha type-4	PSMA4
P00491	P00491	Purine nucleoside phosphorylase	PNP
Q9UK76	Q9UK76	Hematological and neurological expressed 1 protein;Hematological and neurological expressed 1 protein, N-terminally processed	HN1
P68036;A0A1B0GUS4	P68036	Ubiquitin-conjugating enzyme E2 L3	UBE2L3
P53396	P53396	ATP-citrate synthase	ACLY
Q08629;Q9BQ16	Q08629	Testican-1	SPOCK1
Q8IYT4	Q8IYT4	Katanin p60 ATPase-containing subunit A-like 2	KATNAL2
P07093	P07093	Glia-derived nexin	SERPINE2
P05388;Q8NHW5	P05388;Q8NHW5	60S acidic ribosomal protein P0;60S acidic ribosomal protein P0-like	RPLP0;RPLP0P6
P62424	P62424	60S ribosomal protein L7a	RPL7A
Q02790	Q02790	Peptidyl-prolyl cis-trans isomerase FKBP4;Peptidyl-prolyl cis-trans isomerase FKBP4, N-terminally processed	FKBP4
P11766	P11766	Alcohol dehydrogenase class-3	ADH5
P07954	P07954	Fumarate hydratase, mitochondrial	FH
P61978	P61978	Heterogeneous nuclear ribonucleoprotein K	HNRNPK
P11047	P11047	Laminin subunit gamma-1	LAMC1
P04844	P04844	Dolichyl-diphosphooligosaccharide--protein glycosyltransferase subunit 2	RPN2
Q8NC51	Q8NC51	Plasminogen activator inhibitor 1 RNA-binding protein	SERBP1
P49368	P49368	T-complex protein 1 subunit gamma	CCT3
P99999;CON__P62894	P99999	Cytochrome c	CYCS
P36542	P36542	ATP synthase subunit gamma, mitochondrial	ATP5C1
Q99574	Q99574	Neuroserpin	SERPINI1
P31153;Q00266	P31153	S-adenosylmethionine synthase isoform type-2	MAT2A
P17987	P17987	T-complex protein 1 subunit alpha	TCP1
P21589	P21589	5-nucleotidase	NT5E
Q16363	Q16363	Laminin subunit alpha-4	LAMA4
P07942	P07942	Laminin subunit beta-1	LAMB1
O14980	O14980	Exportin-1	XPO1
P28066	P28066	Proteasome subunit alpha type-5	PSMA5
P62917	P62917	60S ribosomal protein L8	RPL8
P42785	P42785	Lysosomal Pro-X carboxypeptidase	PRCP
Q9P258	Q9P258	Protein RCC2	RCC2
E9PAV3;Q13765;Q9BZK3	E9PAV3;Q13765	Nascent polypeptide-associated complex subunit alpha, muscle-specific form;Nascent polypeptide-associated complex subunit alpha	NACA
P30085	P30085	UMP-CMP kinase	CMPK1
O60888	O60888	Protein CutA	CUTA
Q04760	Q04760	Lactoylglutathione lyase	GLO1
P06865	P06865	Beta-hexosaminidase subunit alpha	HEXA
P35268	P35268	60S ribosomal protein L22	RPL22
Q9H1E3	Q9H1E3	Nuclear ubiquitous casein and cyclin-dependent kinase substrate 1	NUCKS1
O15067	O15067	Phosphoribosylformylglycinamidine synthase	PFAS
Q7Z3V4	Q7Z3V4	Ubiquitin-protein ligase E3B	UBE3B
Q07021	Q07021	Complement component 1 Q subcomponent-binding protein, mitochondrial	C1QBP
P15311	P15311	Ezrin	EZR
Q14974	Q14974	Importin subunit beta-1	KPNB1
P07108	P07108	Acyl-CoA-binding protein	DBI
Q02878	Q02878	60S ribosomal protein L6	RPL6
Q04917	Q04917	14-3-3 protein eta	YWHAH
P12270	P12270	Nucleoprotein TPR	TPR
P20810	P20810	Calpastatin	CAST
P36578	P36578	60S ribosomal protein L4	RPL4
P25788	P25788	Proteasome subunit alpha type-3	PSMA3
Q92820	Q92820	Gamma-glutamyl hydrolase	GGH
Q15181	Q15181	Inorganic pyrophosphatase	PPA1
P62913	P62913	60S ribosomal protein L11	RPL11
Q9Y5S9	Q9Y5S9	RNA-binding protein 8A	RBM8A
Q9Y210	Q9Y210	Short transient receptor potential channel 6	TRPC6
P50914	P50914	60S ribosomal protein L14	RPL14
P29279	P29279	Connective tissue growth factor	CTGF
P84103;Q16629	P84103	Serine/arginine-rich splicing factor 3	SRSF3
P05141;Q9H0C2	P05141	ADP/ATP translocase 2;ADP/ATP translocase 2, N-terminally processed	SLC25A5
P43490	P43490	Nicotinamide phosphoribosyltransferase	NAMPT
O76061	O76061	Stanniocalcin-2	STC2
P18124	P18124	60S ribosomal protein L7	RPL7
P31943	P31943	Heterogeneous nuclear ribonucleoprotein H;Heterogeneous nuclear ribonucleoprotein H, N-terminally processed	HNRNPH1
P35637	P35637	RNA-binding protein FUS	FUS
P49721	P49721	Proteasome subunit beta type-2	PSMB2
P13693	P13693	Translationally-controlled tumor protein	TPT1
P62277	P62277	40S ribosomal protein S13	RPS13
P02452;CON__Q862S4	P02452	Collagen alpha-1(I) chain	COL1A1
O75369	O75369	Filamin-B	FLNB
P05455	P05455	Lupus La protein	SSB
P50991	P50991	T-complex protein 1 subunit delta	CCT4
P49720	P49720	Proteasome subunit beta type-3	PSMB3
Q15185	Q15185	Prostaglandin E synthase 3	PTGES3
P43487	P43487	Ran-specific GTPase-activating protein	RANBP1
P10321	P10321	HLA class I histocompatibility antigen, Cw-7 alpha chain	HLA-C
P06280	P06280	Alpha-galactosidase A	GLA
P12004	P12004	Proliferating cell nuclear antigen	PCNA
P08572	P08572	Collagen alpha-2(IV) chain;Canstatin	COL4A2
P78371	P78371	T-complex protein 1 subunit beta	CCT2
Q70EL2	Q70EL2	Ubiquitin carboxyl-terminal hydrolase 45	USP45
P28799	P28799	Granulins;Acrogranin;Paragranulin;Granulin-1;Granulin-2;Granulin-3;Granulin-4;Granulin-5;Granulin-6;Granulin-7	GRN
Q10471	Q10471	Polypeptide N-acetylgalactosaminyltransferase 2;Polypeptide N-acetylgalactosaminyltransferase 2 soluble form	GALNT2
P28074	P28074	Proteasome subunit beta type-5	PSMB5
P46783;Q9NQ39	P46783;Q9NQ39	40S ribosomal protein S10;Putative 40S ribosomal protein S10-like	RPS10;RPS10P5
P02751	P02751	Fibronectin;Anastellin;Ugl-Y1;Ugl-Y2;Ugl-Y3	FN1
P20700	P20700	Lamin-B1	LMNB1
P07355;A6NMY6	P07355;A6NMY6	Annexin A2;Putative annexin A2-like protein	ANXA2;ANXA2P2
P19105;O14950;P24844	P19105;O14950	Myosin regulatory light chain 12A;Myosin regulatory light chain 12B	MYL12A;MYL12B
O00625	O00625	Pirin	PIR
P12814;P35609	P12814	Alpha-actinin-1	ACTN1
O75531	O75531	Barrier-to-autointegration factor;Barrier-to-autointegration factor, N-terminally processed	BANF1
P23246	P23246	Splicing factor, proline- and glutamine-rich	SFPQ
P12081;P49590	P12081	Histidine--tRNA ligase, cytoplasmic	HARS
P22314	P22314	Ubiquitin-like modifier-activating enzyme 1	UBA1
P10646	P10646	Tissue factor pathway inhibitor	TFPI
Q16555	Q16555	Dihydropyrimidinase-related protein 2	DPYSL2
P98179	P98179	RNA-binding protein 3	RBM3
P59998	P59998	Actin-related protein 2/3 complex subunit 4	ARPC4
P13798	P13798	Acylamino-acid-releasing enzyme	APEH
P08603	P08603	Complement factor H	CFH
P25786	P25786	Proteasome subunit alpha type-1	PSMA1
Q86V81	Q86V81	THO complex subunit 4	ALYREF
P62851	P62851	40S ribosomal protein S25	RPS25
O95633	O95633	Follistatin-related protein 3	FSTL3
Q13126	Q13126	S-methyl-5-thioadenosine phosphorylase	MTAP
P61353	P61353	60S ribosomal protein L27	RPL27
P52907	P52907	F-actin-capping protein subunit alpha-1	CAPZA1
P16152	P16152	Carbonyl reductase [NADPH] 1	CBR1
P50990	P50990	T-complex protein 1 subunit theta	CCT8
P40227;Q92526	P40227	T-complex protein 1 subunit zeta	CCT6A
P48643	P48643	T-complex protein 1 subunit epsilon	CCT5
Q16576	Q16576	Histone-binding protein RBBP7	RBBP7
Q9NY47	Q9NY47	Voltage-dependent calcium channel subunit alpha-2/delta-2;Voltage-dependent calcium channel subunit alpha-2-2;Voltage-dependent calcium channel subunit delta-2	CACNA2D2
P07858	P07858	Cathepsin B;Cathepsin B light chain;Cathepsin B heavy chain	CTSB
P12956	P12956	X-ray repair cross-complementing protein 6	XRCC6
P40429;Q6NVV1	P40429;Q6NVV1	60S ribosomal protein L13a;Putative 60S ribosomal protein L13a protein RPL13AP3	RPL13A;RPL13AP3
Q9H3K6	Q9H3K6	BolA-like protein 2	BOLA2
P62888	P62888	60S ribosomal protein L30	RPL30
P47756	P47756	F-actin-capping protein subunit beta	CAPZB
Q7Z304	Q7Z304	MAM domain-containing protein 2	MAMDC2
P30044	P30044	Peroxiredoxin-5, mitochondrial	PRDX5
P25705	P25705	ATP synthase subunit alpha, mitochondrial	ATP5A1
P37837	P37837	Transaldolase	TALDO1
Q96QK1	Q96QK1	Vacuolar protein sorting-associated protein 35	VPS35
P63279	P63279	SUMO-conjugating enzyme UBC9	UBE2I
Q13813	Q13813	Spectrin alpha chain, non-erythrocytic 1	SPTAN1
P61160	P61160	Actin-related protein 2	ACTR2
P07910;O60812;B7ZW38;B2RXH8;P0DMR1	P07910;O60812;B7ZW38;B2RXH8;P0DMR1	Heterogeneous nuclear ribonucleoproteins C1/C2;Heterogeneous nuclear ribonucleoprotein C-like 1;Heterogeneous nuclear ribonucleoprotein C-like 3;Heterogeneous nuclear ribonucleoprotein C-like 2;Heterogeneous nuclear ribonucleoprotein C-like 4	HNRNPC;HNRNPCL1;HNRNPCL3;HNRNPCL2;HNRNPCL4
P27824	P27824	Calnexin	CANX
P55809	P55809	Succinyl-CoA:3-ketoacid coenzyme A transferase 1, mitochondrial	OXCT1
P16083	P16083	Ribosyldihydronicotinamide dehydrogenase [quinone]	NQO2
P55786;A6NEC2	P55786	Puromycin-sensitive aminopeptidase	NPEPPS
P05121	P05121	Plasminogen activator inhibitor 1	SERPINE1
O76076	O76076	WNT1-inducible-signaling pathway protein 2	WISP2
Q9NRX4	Q9NRX4	14 kDa phosphohistidine phosphatase	PHPT1
P62847	P62847	40S ribosomal protein S24	RPS24
P10768	P10768	S-formylglutathione hydrolase	ESD
Q9NTK5	Q9NTK5	Obg-like ATPase 1	OLA1
P30046;A6NHG4	P30046;A6NHG4	D-dopachrome decarboxylase;D-dopachrome decarboxylase-like protein	DDT;DDTL
Q14204	Q14204	Cytoplasmic dynein 1 heavy chain 1	DYNC1H1
P04080	P04080	Cystatin-B	CSTB
Q99674	Q99674	Cell growth regulator with EF hand domain protein 1	CGREF1
Q15365	Q15365	Poly(rC)-binding protein 1	PCBP1
P11413	P11413	Glucose-6-phosphate 1-dehydrogenase	G6PD
Q9BQA1	Q9BQA1	Methylosome protein 50	WDR77
Q13421	Q13421	Mesothelin;Megakaryocyte-potentiating factor;Mesothelin, cleaved form	MSLN
P62750	P62750	60S ribosomal protein L23a	RPL23A
P47813;O14602	P47813;O14602	Eukaryotic translation initiation factor 1A, X-chromosomal;Eukaryotic translation initiation factor 1A, Y-chromosomal	EIF1AX;EIF1AY
Q13443	Q13443	Disintegrin and metalloproteinase domain-containing protein 9	ADAM9
P41091;Q2VIR3	P41091;Q2VIR3	Eukaryotic translation initiation factor 2 subunit 3;Putative eukaryotic translation initiation factor 2 subunit 3-like protein	EIF2S3;EIF2S3L
Q15084	Q15084	Protein disulfide-isomerase A6	PDIA6
Q16719	Q16719	Kynureninase	KYNU
Q9H773	Q9H773	dCTP pyrophosphatase 1	DCTPP1
P62280	P62280	40S ribosomal protein S11	RPS11
P62829	P62829	60S ribosomal protein L23	RPL23
P26599	P26599	Polypyrimidine tract-binding protein 1	PTBP1
Q99538	Q99538	Legumain	LGMN
P09874	P09874	Poly [ADP-ribose] polymerase 1	PARP1
P46782	P46782	40S ribosomal protein S5;40S ribosomal protein S5, N-terminally processed	RPS5
P46781	P46781	40S ribosomal protein S9	RPS9
P14866	P14866	Heterogeneous nuclear ribonucleoprotein L	HNRNPL
P62244	P62244	40S ribosomal protein S15a	RPS15A
P60981	P60981	Destrin	DSTN
P05067	P05067	Amyloid beta A4 protein;N-APP;Soluble APP-alpha;Soluble APP-beta;C99;Beta-amyloid protein 42;Beta-amyloid protein 40;C83;P3(42);P3(40);C80;Gamma-secretase C-terminal fragment 59;Gamma-secretase C-terminal fragment 57;Gamma-secretase C-terminal fragment 50;C31	APP
P50454	P50454	Serpin H1	SERPINH1
Q15393	Q15393	Splicing factor 3B subunit 3	SF3B3
P00390	P00390	Glutathione reductase, mitochondrial	GSR
P32004	P32004	Neural cell adhesion molecule L1	L1CAM
O14744	O14744	Protein arginine N-methyltransferase 5;Protein arginine N-methyltransferase 5, N-terminally processed	PRMT5
P16401	P16401	Histone H1.5	HIST1H1B
O00764	O00764	Pyridoxal kinase	PDXK
O75874	O75874	Isocitrate dehydrogenase [NADP] cytoplasmic	IDH1
Q9UMS4	Q9UMS4	Pre-mRNA-processing factor 19	PRPF19
Q63ZE4	Q63ZE4	Solute carrier family 22 member 10	SLC22A10
Q96A72;P61326	Q96A72;P61326	Protein mago nashi homolog 2;Protein mago nashi homolog	MAGOHB;MAGOH
P60866	P60866	40S ribosomal protein S20	RPS20
P61204;P84077;P84085;P18085	P61204;P84077;P84085;P18085	ADP-ribosylation factor 3;ADP-ribosylation factor 1;ADP-ribosylation factor 5;ADP-ribosylation factor 4	ARF3;ARF1;ARF5;ARF4
Q9UHD1	Q9UHD1	Cysteine and histidine-rich domain-containing protein 1	CHORDC1
Q13442	Q13442	28 kDa heat- and acid-stable phosphoprotein	PDAP1
P09104	P09104	Gamma-enolase	ENO2
Q9NS25;Q9NS26;Q9BXN6;Q9NY87	Q9NS25;Q9NS26;Q9BXN6;Q9NY87	Sperm protein associated with the nucleus on the X chromosome B/F;Sperm protein associated with the nucleus on the X chromosome A;Sperm protein associated with the nucleus on the X chromosome D;Sperm protein associated with the nucleus on the X chromosome C	SPANXB1;SPANXA1;SPANXD;SPANXC
P48745	P48745	Protein NOV homolog	NOV
P43243	P43243	Matrin-3	MATR3
P06576	P06576	ATP synthase subunit beta, mitochondrial	ATP5B
Q9Y617	Q9Y617	Phosphoserine aminotransferase	PSAT1
P63208	P63208	S-phase kinase-associated protein 1	SKP1
P52272	P52272	Heterogeneous nuclear ribonucleoprotein M	HNRNPM
P12236;P12235	P12236;P12235	ADP/ATP translocase 3;ADP/ATP translocase 3, N-terminally processed;ADP/ATP translocase 1	SLC25A6;SLC25A4
P30040	P30040	Endoplasmic reticulum resident protein 29	ERP29
P17174	P17174	Aspartate aminotransferase, cytoplasmic	GOT1
Q58FF8	Q58FF8	Putative heat shock protein HSP 90-beta 2	HSP90AB2P
P61088;Q5JXB2	P61088;Q5JXB2	Ubiquitin-conjugating enzyme E2 N;Putative ubiquitin-conjugating enzyme E2 N-like	UBE2N;UBE2NL
Q9UBT7	Q9UBT7	Alpha-catulin	CTNNAL1
P55884	P55884	Eukaryotic translation initiation factor 3 subunit B	EIF3B
P24666	P24666	Low molecular weight phosphotyrosine protein phosphatase	ACP1
Q99436	Q99436	Proteasome subunit beta type-7	PSMB7
O15230	O15230	Laminin subunit alpha-5	LAMA5
Q9Y2B0	Q9Y2B0	Protein canopy homolog 2	CNPY2
Q00839	Q00839	Heterogeneous nuclear ribonucleoprotein U	HNRNPU
P30153;P30154	P30153	Serine/threonine-protein phosphatase 2A 65 kDa regulatory subunit A alpha isoform	PPP2R1A
P39023	P39023	60S ribosomal protein L3	RPL3
P55060	P55060	Exportin-2	CSE1L
P31327	P31327	Carbamoyl-phosphate synthase [ammonia], mitochondrial	CPS1
P49458	P49458	Signal recognition particle 9 kDa protein	SRP9
Q01518	Q01518	Adenylyl cyclase-associated protein 1	CAP1
Q02543	Q02543	60S ribosomal protein L18a	RPL18A
P06132	P06132	Uroporphyrinogen decarboxylase	UROD
P49321	P49321	Nuclear autoantigenic sperm protein	NASP
P01024	P01024	Complement C3;Complement C3 beta chain;C3-beta-c;Complement C3 alpha chain;C3a anaphylatoxin;Acylation stimulating protein;Complement C3b alpha chain;Complement C3c alpha chain fragment 1;Complement C3dg fragment;Complement C3g fragment;Complement C3d fragment;Complement C3f fragment;Complement C3c alpha chain fragment 2	C3
P62249	P62249	40S ribosomal protein S16	RPS16
Q6YHK3	Q6YHK3	CD109 antigen	CD109
P63165;G2XKQ0	P63165;G2XKQ0	Small ubiquitin-related modifier 1;Small ubiquitin-related modifier	SUMO1
Q99715	Q99715	Collagen alpha-1(XII) chain	COL12A1
Q9GZX9	Q9GZX9	Twisted gastrulation protein homolog 1	TWSG1
P15121	P15121	Aldose reductase	AKR1B1
P61158;Q9P1U1;Q9C0K3	P61158	Actin-related protein 3	ACTR3
Q9HC38	Q9HC38	Glyoxalase domain-containing protein 4	GLOD4
P14550	P14550	Alcohol dehydrogenase [NADP(+)]	AKR1A1
P11940;Q9H361;Q4VXU2;Q96DU9	P11940	Polyadenylate-binding protein 1	PABPC1
P54819	P54819	Adenylate kinase 2, mitochondrial;Adenylate kinase 2, mitochondrial, N-terminally processed	AK2
O43813	O43813	LanC-like protein 1	LANCL1
Q9Y6N7	Q9Y6N7	Roundabout homolog 1	ROBO1
P36871	P36871	Phosphoglucomutase-1	PGM1
P09493	P09493	Tropomyosin alpha-1 chain	TPM1
P18077	P18077	60S ribosomal protein L35a	RPL35A
Q96KP4	Q96KP4	Cytosolic non-specific dipeptidase	CNDP2
P08708	P08708	40S ribosomal protein S17	RPS17
P48723	P48723	Heat shock 70 kDa protein 13	HSPA13
P56537	P56537	Eukaryotic translation initiation factor 6	EIF6
O75390	O75390	Citrate synthase, mitochondrial	CS
Q7Z406	Q7Z406	Myosin-14	MYH14
Q12907	Q12907	Vesicular integral-membrane protein VIP36	LMAN2
P62269	P62269	40S ribosomal protein S18	RPS18
O75821	O75821	Eukaryotic translation initiation factor 3 subunit G	EIF3G
Q02388	Q02388	Collagen alpha-1(VII) chain	COL7A1
O75223	O75223	Gamma-glutamylcyclotransferase	GGCT
Q92973	Q92973	Transportin-1	TNPO1
Q8N4C6	Q8N4C6	Ninein	NIN
O14773	O14773	Tripeptidyl-peptidase 1	TPP1
P28070	P28070	Proteasome subunit beta type-4	PSMB4
Q6WRI0	Q6WRI0	Immunoglobulin superfamily member 10	IGSF10
P62861	P62861	40S ribosomal protein S30	FAU
Q68BL7	Q68BL7	Olfactomedin-like protein 2A	OLFML2A
P62899	P62899	60S ribosomal protein L31	RPL31
P04439;P01893	P04439;P01893	HLA class I histocompatibility antigen, A-3 alpha chain;Putative HLA class I histocompatibility antigen, alpha chain H	HLA-A;HLA-H
Q9NP84	Q9NP84	Tumor necrosis factor receptor superfamily member 12A	TNFRSF12A
P13667	P13667	Protein disulfide-isomerase A4	PDIA4
O60506	O60506	Heterogeneous nuclear ribonucleoprotein Q	SYNCRIP
P38646	P38646	Stress-70 protein, mitochondrial	HSPA9
P38159;Q96E39;Q8N7X1;O75526	P38159;Q96E39	RNA-binding motif protein, X chromosome;RNA-binding motif protein, X chromosome, N-terminally processed;RNA binding motif protein, X-linked-like-1	RBMX;RBMXL1
Q15818	Q15818	Neuronal pentraxin-1	NPTX1
Q07955	Q07955	Serine/arginine-rich splicing factor 1	SRSF1
O14737	O14737	Programmed cell death protein 5	PDCD5
P83916	P83916	Chromobox protein homolog 1	CBX1
P46940	P46940	Ras GTPase-activating-like protein IQGAP1	IQGAP1
P26373	P26373	60S ribosomal protein L13	RPL13
P54727	P54727	UV excision repair protein RAD23 homolog B	RAD23B
O60568	O60568	Procollagen-lysine,2-oxoglutarate 5-dioxygenase 3	PLOD3
P21266	P21266	Glutathione S-transferase Mu 3	GSTM3
Q9UKY7	Q9UKY7	Protein CDV3 homolog	CDV3
P22102	P22102	Trifunctional purine biosynthetic protein adenosine-3;Phosphoribosylamine--glycine ligase;Phosphoribosylformylglycinamidine cyclo-ligase;Phosphoribosylglycinamide formyltransferase	GART
P05161	P05161	Ubiquitin-like protein ISG15	ISG15
Q99729	Q99729	Heterogeneous nuclear ribonucleoprotein A/B	HNRNPAB
P08195	P08195	4F2 cell-surface antigen heavy chain	SLC3A2
P26885	P26885	Peptidyl-prolyl cis-trans isomerase FKBP2	FKBP2
Q6MZW2	Q6MZW2	Follistatin-related protein 4	FSTL4
O00469	O00469	Procollagen-lysine,2-oxoglutarate 5-dioxygenase 2	PLOD2
P36952	P36952	Serpin B5	SERPINB5
P26368	P26368	Splicing factor U2AF 65 kDa subunit	U2AF2
Q92598	Q92598	Heat shock protein 105 kDa	HSPH1
P63220	P63220	40S ribosomal protein S21	RPS21
Q6EMK4	Q6EMK4	Vasorin	VASN
Q15691	Q15691	Microtubule-associated protein RP/EB family member 1	MAPRE1
Q7L1Q6	Q7L1Q6	Basic leucine zipper and W2 domain-containing protein 1	BZW1
P62854	P62854	40S ribosomal protein S26	RPS26
P46926	P46926	Glucosamine-6-phosphate isomerase 1	GNPDA1
P61254;Q9UNX3	P61254;Q9UNX3	60S ribosomal protein L26;60S ribosomal protein L26-like 1	RPL26;RPL26L1
P31150	P31150	Rab GDP dissociation inhibitor alpha	GDI1
Q15366;P57721	Q15366;P57721	Poly(rC)-binding protein 2;Poly(rC)-binding protein 3	PCBP2;PCBP3
Q15056	Q15056	Eukaryotic translation initiation factor 4H	EIF4H
Q9Y266	Q9Y266	Nuclear migration protein nudC	NUDC
Q9BWD1	Q9BWD1	Acetyl-CoA acetyltransferase, cytosolic	ACAT2
P46776	P46776	60S ribosomal protein L27a	RPL27A
P50502;Q8IZP2;Q8NFI4	P50502;Q8IZP2;Q8NFI4	Hsc70-interacting protein;Putative protein FAM10A4;Putative protein FAM10A5	ST13;ST13P4;ST13P5
P23381	P23381	Tryptophan--tRNA ligase, cytoplasmic;T1-TrpRS;T2-TrpRS	WARS
P33316	P33316	Deoxyuridine 5-triphosphate nucleotidohydrolase, mitochondrial	DUT
P29966	P29966	Myristoylated alanine-rich C-kinase substrate	MARCKS
P02656	P02656	Apolipoprotein C-III	APOC3
Q14515	Q14515	SPARC-like protein 1	SPARCL1
P13637;Q13733	P13637	Sodium/potassium-transporting ATPase subunit alpha-3	ATP1A3
O95336	O95336	6-phosphogluconolactonase	PGLS
Q86VP6	Q86VP6	Cullin-associated NEDD8-dissociated protein 1	CAND1
Q09666	Q09666	Neuroblast differentiation-associated protein AHNAK	AHNAK
Q9Y547	Q9Y547	Intraflagellar transport protein 25 homolog	HSPB11
P41250	P41250	Glycine--tRNA ligase	GARS
Q9BQE3	Q9BQE3	Tubulin alpha-1C chain	TUBA1C
Q9UL46	Q9UL46	Proteasome activator complex subunit 2	PSME2
Q99873	Q99873	Protein arginine N-methyltransferase 1	PRMT1
Q9Y696	Q9Y696	Chloride intracellular channel protein 4	CLIC4
Q01082;P11277	Q01082	Spectrin beta chain, non-erythrocytic 1	SPTBN1
Q9UBT2	Q9UBT2	SUMO-activating enzyme subunit 2	UBA2
Q92522	Q92522	Histone H1x	H1FX
P41567	P41567	Eukaryotic translation initiation factor 1	EIF1
P21810	P21810	Biglycan	BGN
P42167;P42166	P42167;P42166	Lamina-associated polypeptide 2, isoforms beta/gamma;Thymopoietin;Thymopentin;Lamina-associated polypeptide 2, isoform alpha;Thymopoietin;Thymopentin	TMPO
O76003	O76003	Glutaredoxin-3	GLRX3
P09960	P09960	Leukotriene A-4 hydrolase	LTA4H
P0C0L5;P0C0L4	P0C0L5;P0C0L4	Complement C4-B;Complement C4 beta chain;Complement C4-B alpha chain;C4a anaphylatoxin;C4b-B;C4d-B;Complement C4 gamma chain;Complement C4-A;Complement C4 beta chain;Complement C4-A alpha chain;C4a anaphylatoxin;C4b-A;C4d-A;Complement C4 gamma chain	C4B;C4A
Q12905	Q12905	Interleukin enhancer-binding factor 2	ILF2
Q9NUQ9	Q9NUQ9	Protein FAM49B	FAM49B
Q92743	Q92743	Serine protease HTRA1	HTRA1
Q9UI42	Q9UI42	Carboxypeptidase A4	CPA4
P42126	P42126	Enoyl-CoA delta isomerase 1, mitochondrial	ECI1
O75937	O75937	DnaJ homolog subfamily C member 8	DNAJC8
P45880	P45880	Voltage-dependent anion-selective channel protein 2	VDAC2
Q9UKK9	Q9UKK9	ADP-sugar pyrophosphatase	NUDT5
P52292	P52292	Importin subunit alpha-1	KPNA2
P78417	P78417	Glutathione S-transferase omega-1	GSTO1
P80303	P80303	Nucleobindin-2;Nesfatin-1	NUCB2
Q16643	Q16643	Drebrin	DBN1
Q96EY8	Q96EY8	Cob(I)yrinic acid a,c-diamide adenosyltransferase, mitochondrial	MMAB
P12532;P17540	P12532	Creatine kinase U-type, mitochondrial	CKMT1A
Q9Y265	Q9Y265	RuvB-like 1	RUVBL1
P49257	P49257	Protein ERGIC-53	LMAN1
P15586	P15586	N-acetylglucosamine-6-sulfatase	GNS
P04083	P04083	Annexin A1	ANXA1
P43034	P43034	Platelet-activating factor acetylhydrolase IB subunit alpha	PAFAH1B1
P06396	P06396	Gelsolin	GSN
P39019	P39019	40S ribosomal protein S19	RPS19
Q13263	Q13263	Transcription intermediary factor 1-beta	TRIM28
P67775;P62714	P67775;P62714	Serine/threonine-protein phosphatase 2A catalytic subunit alpha isoform;Serine/threonine-protein phosphatase 2A catalytic subunit beta isoform	PPP2CA;PPP2CB
P00746	P00746	Complement factor D	CFD
P61163	P61163	Alpha-centractin	ACTR1A
O15144	O15144	Actin-related protein 2/3 complex subunit 2	ARPC2
O43390	O43390	Heterogeneous nuclear ribonucleoprotein R	HNRNPR
P05198	P05198	Eukaryotic translation initiation factor 2 subunit 1	EIF2S1
P27816	P27816	Microtubule-associated protein 4	MAP4
Q99613;B5ME19	Q99613;B5ME19	Eukaryotic translation initiation factor 3 subunit C;Eukaryotic translation initiation factor 3 subunit C-like protein	EIF3C;EIF3CL
P30520;Q8N142	P30520	Adenylosuccinate synthetase isozyme 2	ADSS
Q13151	Q13151	Heterogeneous nuclear ribonucleoprotein A0	HNRNPA0
O15347	O15347	High mobility group protein B3	HMGB3
P07305	P07305	Histone H1.0;Histone H1.0, N-terminally processed	H1F0
P28300	P28300	Protein-lysine 6-oxidase	LOX
Q9Y490;Q9Y4G6	Q9Y490	Talin-1	TLN1
O95373;O15397	O95373	Importin-7	IPO7
Q08211	Q08211	ATP-dependent RNA helicase A	DHX9
Q16181;Q6ZU15	Q16181	Septin-7	2023-09-07
A6NDG6	A6NDG6	Phosphoglycolate phosphatase	PGP
Q99798	Q99798	Aconitate hydratase, mitochondrial	ACO2
P47755	P47755	F-actin-capping protein subunit alpha-2	CAPZA2
Q8NCW5	Q8NCW5	NAD(P)H-hydrate epimerase	APOA1BP
P42771;P42772	P42771	Cyclin-dependent kinase inhibitor 2A	CDKN2A
Q15427	Q15427	Splicing factor 3B subunit 4	SF3B4
P35080	P35080	Profilin-2	PFN2
Q13228	Q13228	Selenium-binding protein 1	SELENBP1
O15446	O15446	DNA-directed RNA polymerase I subunit RPA34	CD3EAP
P61086	P61086	Ubiquitin-conjugating enzyme E2 K	UBE2K
Q06323	Q06323	Proteasome activator complex subunit 1	PSME1
P07814	P07814	Bifunctional glutamate/proline--tRNA ligase;Glutamate--tRNA ligase;Proline--tRNA ligase	EPRS
P30043	P30043	Flavin reductase (NADPH)	BLVRB
Q12906	Q12906	Interleukin enhancer-binding factor 3	ILF3
P15104	P15104	Glutamine synthetase	GLUL
O95433	O95433	Activator of 90 kDa heat shock protein ATPase homolog 1	AHSA1
O95777	O95777	U6 snRNA-associated Sm-like protein LSm8	LSM8
P63151;Q66LE6;Q00005;Q9Y2T4	P63151;Q66LE6;Q00005	Serine/threonine-protein phosphatase 2A 55 kDa regulatory subunit B alpha isoform;Serine/threonine-protein phosphatase 2A 55 kDa regulatory subunit B delta isoform;Serine/threonine-protein phosphatase 2A 55 kDa regulatory subunit B beta isoform	PPP2R2A;PPP2R2D;PPP2R2B
P83731	P83731	60S ribosomal protein L24	RPL24
P14868	P14868	Aspartate--tRNA ligase, cytoplasmic	DARS
Q9NWV4	Q9NWV4	UPF0587 protein C1orf123	C1orf123
P00966	P00966	Argininosuccinate synthase	ASS1
Q05682	Q05682	Caldesmon	CALD1
P20042	P20042	Eukaryotic translation initiation factor 2 subunit 2	EIF2S2
Q9Y230	Q9Y230	RuvB-like 2	RUVBL2
Q14914	Q14914	Prostaglandin reductase 1	PTGR1
Q9Y237	Q9Y237	Peptidyl-prolyl cis-trans isomerase NIMA-interacting 4	PIN4
O00584	O00584	Ribonuclease T2	RNASET2
P55290	P55290	Cadherin-13	CDH13
Q15019	Q15019	Septin-2	2023-09-02
P62495	P62495	Eukaryotic peptide chain release factor subunit 1	ETF1
Q9H299	Q9H299	SH3 domain-binding glutamic acid-rich-like protein 3	SH3BGRL3
Q13510	Q13510	Acid ceramidase;Acid ceramidase subunit alpha;Acid ceramidase subunit beta	ASAH1
Q08945	Q08945	FACT complex subunit SSRP1	SSRP1
P30566	P30566	Adenylosuccinate lyase	ADSL
P19623	P19623	Spermidine synthase	SRM
Q13283	Q13283	Ras GTPase-activating protein-binding protein 1	G3BP1
P21796	P21796	Voltage-dependent anion-selective channel protein 1	VDAC1
P61077;P62837;Q9Y2X8;P51668	P61077;P62837	Ubiquitin-conjugating enzyme E2 D3;Ubiquitin-conjugating enzyme E2 D2	UBE2D3;UBE2D2
P55145	P55145	Mesencephalic astrocyte-derived neurotrophic factor	MANF
O14745	O14745	Na(+)/H(+) exchange regulatory cofactor NHE-RF1	SLC9A3R1
Q9BRF8	Q9BRF8	Serine/threonine-protein phosphatase CPPED1	CPPED1
P25391	P25391	Laminin subunit alpha-1	LAMA1
O43396	O43396	Thioredoxin-like protein 1	TXNL1
O15145	O15145	Actin-related protein 2/3 complex subunit 3	ARPC3
P01344	P01344	Insulin-like growth factor II;Insulin-like growth factor II;Insulin-like growth factor II Ala-25 Del;Preptin	IGF2
P61313	P61313	60S ribosomal protein L15	RPL15
Q96CT7	Q96CT7	Coiled-coil domain-containing protein 124	CCDC124
Q96FW1	Q96FW1	Ubiquitin thioesterase OTUB1	OTUB1
P35237	P35237	Serpin B6	SERPINB6
Q6UXI9	Q6UXI9	Nephronectin	NPNT
O15394	O15394	Neural cell adhesion molecule 2	NCAM2
Q9Y3F4	Q9Y3F4	Serine-threonine kinase receptor-associated protein	STRAP
P49189	P49189	4-trimethylaminobutyraldehyde dehydrogenase	ALDH9A1
P04818	P04818	Thymidylate synthase	TYMS
Q9H0U4;P62820;Q92928;Q92930;P61006;P51153;P59190	Q9H0U4;P62820;Q92928	Ras-related protein Rab-1B;Ras-related protein Rab-1A;Putative Ras-related protein Rab-1C	RAB1B;RAB1A;RAB1C
Q9Y281	Q9Y281	Cofilin-2	CFL2
Q14980	Q14980	Nuclear mitotic apparatus protein 1	NUMA1
Q96DG6	Q96DG6	Carboxymethylenebutenolidase homolog	CMBL
P49459	P49459	Ubiquitin-conjugating enzyme E2 A	UBE2A
P18065	P18065	Insulin-like growth factor-binding protein 2	IGFBP2
P22234	P22234	Multifunctional protein ADE2;Phosphoribosylaminoimidazole-succinocarboxamide synthase;Phosphoribosylaminoimidazole carboxylase	PAICS
P41252	P41252	Isoleucine--tRNA ligase, cytoplasmic	IARS
P52815	P52815	39S ribosomal protein L12, mitochondrial	MRPL12
P52434	P52434	DNA-directed RNA polymerases I, II, and III subunit RPABC3	POLR2H
P51884	P51884	Lumican	LUM
P15559	P15559	NAD(P)H dehydrogenase [quinone] 1	NQO1
Q969H8	Q969H8	Myeloid-derived growth factor	MYDGF
Q14126	Q14126	Desmoglein-2	DSG2
P13284	P13284	Gamma-interferon-inducible lysosomal thiol reductase	IFI30
Q6IBS0	Q6IBS0	Twinfilin-2	TWF2
Q04828;P52895	Q04828;P52895	Aldo-keto reductase family 1 member C1;Aldo-keto reductase family 1 member C2	AKR1C1;AKR1C2
P55010	P55010	Eukaryotic translation initiation factor 5	EIF5
O43447	O43447	Peptidyl-prolyl cis-trans isomerase H	PPIH
Q9BTT0	Q9BTT0	Acidic leucine-rich nuclear phosphoprotein 32 family member E	ANP32E
Q96TA1	Q96TA1	Niban-like protein 1	FAM129B
P00568	P00568	Adenylate kinase isoenzyme 1	AK1
Q9NZV1	Q9NZV1	Cysteine-rich motor neuron 1 protein;Processed cysteine-rich motor neuron 1 protein	CRIM1
P08621	P08621	U1 small nuclear ribonucleoprotein 70 kDa	SNRNP70
P53999	P53999	Activated RNA polymerase II transcriptional coactivator p15	SUB1
P13521	P13521	Secretogranin-2;Secretoneurin;Manserin	SCG2
P06858	P06858	Lipoprotein lipase	LPL
P23921	P23921	Ribonucleoside-diphosphate reductase large subunit	RRM1
P61758	P61758	Prefoldin subunit 3	VBP1
P16278	P16278	Beta-galactosidase	GLB1
O43809	O43809	Cleavage and polyadenylation specificity factor subunit 5	NUDT21
P23588	P23588	Eukaryotic translation initiation factor 4B	EIF4B
P35556	P35556	Fibrillin-2	FBN2
P21281	P21281	V-type proton ATPase subunit B, brain isoform	ATP6V1B2
Q15904	Q15904	V-type proton ATPase subunit S1	ATP6AP1
Q04446	Q04446	1,4-alpha-glucan-branching enzyme	GBE1
P63173	P63173	60S ribosomal protein L38	RPL38
Q16143	Q16143	Beta-synuclein	SNCB
Q01995	Q01995	Transgelin	TAGLN
P08581	P08581	Hepatocyte growth factor receptor	MET
Q96DI7	Q96DI7	U5 small nuclear ribonucleoprotein 40 kDa protein	SNRNP40
P51991	P51991	Heterogeneous nuclear ribonucleoprotein A3	HNRNPA3
P11387	P11387	DNA topoisomerase 1	TOP1
P12268	P12268	Inosine-5-monophosphate dehydrogenase 2	IMPDH2
O00567	O00567	Nucleolar protein 56	NOP56
P28838	P28838	Cytosol aminopeptidase	LAP3
Q92734	Q92734	Protein TFG	TFG
P06737;P11217	P06737	Glycogen phosphorylase, liver form	PYGL
P55769	P55769	NHP2-like protein 1;NHP2-like protein 1, N-terminally processed	NHP2L1
O43776	O43776	Asparagine--tRNA ligase, cytoplasmic	NARS
P45877	P45877	Peptidyl-prolyl cis-trans isomerase C	PPIC
P54136	P54136	Arginine--tRNA ligase, cytoplasmic	RARS
Q8WUM4	Q8WUM4	Programmed cell death 6-interacting protein	PDCD6IP
P53041	P53041	Serine/threonine-protein phosphatase 5	PPP5C
O75368	O75368	SH3 domain-binding glutamic acid-rich-like protein	SH3BGRL
O75340	O75340	Programmed cell death protein 6	PDCD6
P17050	P17050	Alpha-N-acetylgalactosaminidase	NAGA
Q8NBS9	Q8NBS9	Thioredoxin domain-containing protein 5	TXNDC5
P61916	P61916	Epididymal secretory protein E1	NPC2
P68400;Q8NEV1	P68400;Q8NEV1	Casein kinase II subunit alpha;Casein kinase II subunit alpha 3	CSNK2A1;CSNK2A3
P62316	P62316	Small nuclear ribonucleoprotein Sm D2	SNRPD2
Q00796	Q00796	Sorbitol dehydrogenase	SORD
P34897	P34897	Serine hydroxymethyltransferase, mitochondrial	SHMT2
P13489	P13489	Ribonuclease inhibitor	RNH1
Q9H2H8	Q9H2H8	Peptidyl-prolyl cis-trans isomerase-like 3	PPIL3
P60983;O60234	P60983	Glia maturation factor beta	GMFB
P55327	P55327	Tumor protein D52	TPD52
Q9UQ53	Q9UQ53	Alpha-1,3-mannosyl-glycoprotein 4-beta-N-acetylglucosaminyltransferase B	MGAT4B
Q9NQR4	Q9NQR4	Omega-amidase NIT2	NIT2
Q05707	Q05707	Collagen alpha-1(XIV) chain	COL14A1
Q13509	Q13509	Tubulin beta-3 chain	TUBB3
P29144	P29144	Tripeptidyl-peptidase 2	TPP2
P00742	P00742	Coagulation factor X;Factor X light chain;Factor X heavy chain;Activated factor Xa heavy chain	F10
P43121	P43121	Cell surface glycoprotein MUC18	MCAM
O75436	O75436	Vacuolar protein sorting-associated protein 26A	VPS26A
Q15257	Q15257	Serine/threonine-protein phosphatase 2A activator	PPP2R4
P27635	P27635	60S ribosomal protein L10	RPL10
P20290	P20290	Transcription factor BTF3	BTF3
Q99623	Q99623	Prohibitin-2	PHB2
Q9BZK7;O60907	Q9BZK7;O60907	F-box-like/WD repeat-containing protein TBL1XR1;F-box-like/WD repeat-containing protein TBL1X	TBL1XR1;TBL1X
P31040	P31040	Succinate dehydrogenase [ubiquinone] flavoprotein subunit, mitochondrial	SDHA
P62995	P62995	Transformer-2 protein homolog beta	TRA2B
Q96AE4	Q96AE4	Far upstream element-binding protein 1	FUBP1
O75787	O75787	Renin receptor	ATP6AP2
Q12792	Q12792	Twinfilin-1	TWF1
P07919	P07919	Cytochrome b-c1 complex subunit 6, mitochondrial	UQCRH
P84098	P84098	60S ribosomal protein L19	RPL19
P21399	P21399	Cytoplasmic aconitate hydratase	ACO1
O14929	O14929	Histone acetyltransferase type B catalytic subunit	HAT1
Q13435	Q13435	Splicing factor 3B subunit 2	SF3B2
Q9ULV4	Q9ULV4	Coronin-1C	CORO1C
Q14444	Q14444	Caprin-1	CAPRIN1
Q9Y3A5	Q9Y3A5	Ribosome maturation protein SBDS	SBDS
Q16543	Q16543	Hsp90 co-chaperone Cdc37;Hsp90 co-chaperone Cdc37, N-terminally processed	CDC37
P35659	P35659	Protein DEK	DEK
P68366	P68366	Tubulin alpha-4A chain	TUBA4A
Q8NI22	Q8NI22	Multiple coagulation factor deficiency protein 2	MCFD2
Q9Y333	Q9Y333	U6 snRNA-associated Sm-like protein LSm2	LSM2
O60869	O60869	Endothelial differentiation-related factor 1	EDF1
Q96AG4	Q96AG4	Leucine-rich repeat-containing protein 59	LRRC59
O43399	O43399	Tumor protein D54	TPD52L2
P17655	P17655	Calpain-2 catalytic subunit	CAPN2
Q13347	Q13347	Eukaryotic translation initiation factor 3 subunit I	EIF3I
P61224;P62834;A6NIZ1	P61224;P62834;A6NIZ1	Ras-related protein Rap-1b;Ras-related protein Rap-1A;Ras-related protein Rap-1b-like protein	RAP1B;RAP1A
P54578	P54578	Ubiquitin carboxyl-terminal hydrolase 14	USP14
O15212	O15212	Prefoldin subunit 6	PFDN6
P35244	P35244	Replication protein A 14 kDa subunit	RPA3
P63000;P60763	P63000;P60763	Ras-related C3 botulinum toxin substrate 1;Ras-related C3 botulinum toxin substrate 3	RAC1;RAC3
P54725	P54725	UV excision repair protein RAD23 homolog A	RAD23A
P61586;P08134;P62745	P61586;P08134;P62745	Transforming protein RhoA;Rho-related GTP-binding protein RhoC;Rho-related GTP-binding protein RhoB	RHOA;RHOC;RHOB
P62310	P62310	U6 snRNA-associated Sm-like protein LSm3	LSM3
P49411	P49411	Elongation factor Tu, mitochondrial	TUFM
P49736	P49736	DNA replication licensing factor MCM2	MCM2
P42765	P42765	3-ketoacyl-CoA thiolase, mitochondrial	ACAA2
O43175	O43175	D-3-phosphoglycerate dehydrogenase	PHGDH
Q16836	Q16836	Hydroxyacyl-coenzyme A dehydrogenase, mitochondrial	HADH
P16402	P16402	Histone H1.3	HIST1H1D
P52597	P52597	Heterogeneous nuclear ribonucleoprotein F;Heterogeneous nuclear ribonucleoprotein F, N-terminally processed	HNRNPF
Q13867	Q13867	Bleomycin hydrolase	BLMH
Q08257	Q08257	Quinone oxidoreductase	CRYZ
P16989	P16989	Y-box-binding protein 3	YBX3
Q15459	Q15459	Splicing factor 3A subunit 1	SF3A1
O95816	O95816	BAG family molecular chaperone regulator 2	BAG2
Q01081;P0DN76;Q8WU68	Q01081;P0DN76;Q8WU68	Splicing factor U2AF 35 kDa subunit;Splicing factor U2AF 26 kDa subunit	U2AF1;U2AF1L4
Q14919	Q14919	Dr1-associated corepressor	DRAP1
Q15262	Q15262	Receptor-type tyrosine-protein phosphatase kappa	PTPRK
Q32P28	Q32P28	Prolyl 3-hydroxylase 1	LEPRE1
P13929	P13929	Beta-enolase	ENO3
P00367;P49448	P00367	Glutamate dehydrogenase 1, mitochondrial	GLUD1
P60953	P60953	Cell division control protein 42 homolog	CDC42
Q9Y262	Q9Y262	Eukaryotic translation initiation factor 3 subunit L	EIF3L
Q9H910	Q9H910	Hematological and neurological expressed 1-like protein	HN1L
Q9BX68	Q9BX68	Histidine triad nucleotide-binding protein 2, mitochondrial	HINT2
P46108	P46108	Adapter molecule crk	CRK
Q9UHY7	Q9UHY7	Enolase-phosphatase E1	ENOPH1
P16870	P16870	Carboxypeptidase E	CPE
Q15375;Q5JZY3	Q15375;Q5JZY3	Ephrin type-A receptor 7;Ephrin type-A receptor 10	EPHA7;EPHA10
P09622	P09622	Dihydrolipoyl dehydrogenase, mitochondrial	DLD
Q99733	Q99733	Nucleosome assembly protein 1-like 4	NAP1L4
Q15029	Q15029	116 kDa U5 small nuclear ribonucleoprotein component	EFTUD2
P11586	P11586	C-1-tetrahydrofolate synthase, cytoplasmic;Methylenetetrahydrofolate dehydrogenase;Methenyltetrahydrofolate cyclohydrolase;Formyltetrahydrofolate synthetase;C-1-tetrahydrofolate synthase, cytoplasmic, N-terminally processed	MTHFD1
Q9BS26	Q9BS26	Endoplasmic reticulum resident protein 44	ERP44
P52788	P52788	Spermine synthase	SMS
P15170;Q8IYD1	P15170	Eukaryotic peptide chain release factor GTP-binding subunit ERF3A	GSPT1
Q9BY44	Q9BY44	Eukaryotic translation initiation factor 2A;Eukaryotic translation initiation factor 2A, N-terminally processed	EIF2A
P30048	P30048	Thioredoxin-dependent peroxide reductase, mitochondrial	PRDX3
Q9HB71	Q9HB71	Calcyclin-binding protein	CACYBP
O75533	O75533	Splicing factor 3B subunit 1	SF3B1
Q13526	Q13526	Peptidyl-prolyl cis-trans isomerase NIMA-interacting 1	PIN1
Q9H0W9	Q9H0W9	Ester hydrolase C11orf54	C11orf54
Q9UBE0	Q9UBE0	SUMO-activating enzyme subunit 1;SUMO-activating enzyme subunit 1, N-terminally processed	SAE1
O00159	O00159	Unconventional myosin-Ic	MYO1C
Q969Q0;P83881	Q969Q0;P83881	60S ribosomal protein L36a-like;60S ribosomal protein L36a	RPL36AL;RPL36A
Q9HC57	Q9HC57	WAP four-disulfide core domain protein 1	WFDC1
P62136;P36873;P62140	P62136;P36873;P62140	Serine/threonine-protein phosphatase PP1-alpha catalytic subunit;Serine/threonine-protein phosphatase PP1-gamma catalytic subunit;Serine/threonine-protein phosphatase PP1-beta catalytic subunit	PPP1CA;PPP1CC;PPP1CB
Q15717	Q15717	ELAV-like protein 1	ELAVL1
P28482	P28482	Mitogen-activated protein kinase 1	MAPK1
P61960	P61960	Ubiquitin-fold modifier 1	UFM1
Q9P2J5	Q9P2J5	Leucine--tRNA ligase, cytoplasmic	LARS
Q12904	Q12904	Aminoacyl tRNA synthase complex-interacting multifunctional protein 1;Endothelial monocyte-activating polypeptide 2	AIMP1
Q9BRJ6	Q9BRJ6	Uncharacterized protein C7orf50	C7orf50
P51149	P51149	Ras-related protein Rab-7a	RAB7A
O00303	O00303	Eukaryotic translation initiation factor 3 subunit F	EIF3F
Q9Y277	Q9Y277	Voltage-dependent anion-selective channel protein 3	VDAC3
O75503	O75503	Ceroid-lipofuscinosis neuronal protein 5	CLN5
P27708	P27708	CAD protein;Glutamine-dependent carbamoyl-phosphate synthase;Aspartate carbamoyltransferase;Dihydroorotase	CAD
P68402	P68402	Platelet-activating factor acetylhydrolase IB subunit beta	PAFAH1B2
Q1KMD3	Q1KMD3	Heterogeneous nuclear ribonucleoprotein U-like protein 2	HNRNPUL2
P31431	P31431	Syndecan-4	SDC4
P14136	P14136	Glial fibrillary acidic protein	GFAP
Q92841	Q92841	Probable ATP-dependent RNA helicase DDX17	DDX17
Q96K17	Q96K17	Transcription factor BTF3 homolog 4	BTF3L4
Q92499	Q92499	ATP-dependent RNA helicase DDX1	DDX1
O00754	O00754	Lysosomal alpha-mannosidase;Lysosomal alpha-mannosidase A peptide;Lysosomal alpha-mannosidase B peptide;Lysosomal alpha-mannosidase C peptide;Lysosomal alpha-mannosidase D peptide;Lysosomal alpha-mannosidase E peptide	MAN2B1
Q13610	Q13610	Periodic tryptophan protein 1 homolog	PWP1
P35580	P35580	Myosin-10	MYH10
Q96FQ6	Q96FQ6	Protein S100-A16	S100A16
P46778	P46778	60S ribosomal protein L21	RPL21
Q13011	Q13011	Delta(3,5)-Delta(2,4)-dienoyl-CoA isomerase, mitochondrial	ECH1
P26447	P26447	Protein S100-A4	S100A4
Q9UBS4	Q9UBS4	DnaJ homolog subfamily B member 11	DNAJB11
O14579	O14579	Coatomer subunit epsilon	COPE
Q13868	Q13868	Exosome complex component RRP4	EXOSC2
P62873	P62873	Guanine nucleotide-binding protein G(I)/G(S)/G(T) subunit beta-1	GNB1
Q9NZL9	Q9NZL9	Methionine adenosyltransferase 2 subunit beta	MAT2B
P49588	P49588	Alanine--tRNA ligase, cytoplasmic	AARS
Q14247	Q14247	Src substrate cortactin	CTTN
Q15836;P63027	Q15836;P63027	Vesicle-associated membrane protein 3;Vesicle-associated membrane protein 2	VAMP3;VAMP2
P11216	P11216	Glycogen phosphorylase, brain form	PYGB
Q16401	Q16401	26S proteasome non-ATPase regulatory subunit 5	PSMD5
P61289	P61289	Proteasome activator complex subunit 3	PSME3
Q7KZF4	Q7KZF4	Staphylococcal nuclease domain-containing protein 1	SND1
P55084	P55084	Trifunctional enzyme subunit beta, mitochondrial;3-ketoacyl-CoA thiolase	HADHB
Q32MZ4	Q32MZ4	Leucine-rich repeat flightless-interacting protein 1	LRRFIP1
P61964	P61964	WD repeat-containing protein 5	WDR5
O76021	O76021	Ribosomal L1 domain-containing protein 1	RSL1D1
P33991	P33991	DNA replication licensing factor MCM4	MCM4
Q9NY33	Q9NY33	Dipeptidyl peptidase 3	DPP3
O94760;O95865	O94760	N(G),N(G)-dimethylarginine dimethylaminohydrolase 1	DDAH1
Q8N543	Q8N543	Prolyl 3-hydroxylase OGFOD1	OGFOD1
Q16706	Q16706	Alpha-mannosidase 2	MAN2A1
Q9UNW1	Q9UNW1	Multiple inositol polyphosphate phosphatase 1	MINPP1
P18754	P18754	Regulator of chromosome condensation	RCC1
Q96AY3	Q96AY3	Peptidyl-prolyl cis-trans isomerase FKBP10	FKBP10
Q05639	Q05639	Elongation factor 1-alpha 2	EEF1A2
P63098	P63098	Calcineurin subunit B type 1	PPP3R1
P22061	P22061	Protein-L-isoaspartate(D-aspartate) O-methyltransferase	PCMT1
P25205	P25205	DNA replication licensing factor MCM3	MCM3
Q8NCC3	Q8NCC3	Group XV phospholipase A2	PLA2G15
Q9NR45	Q9NR45	Sialic acid synthase	NANS
Q9UQ35	Q9UQ35	Serine/arginine repetitive matrix protein 2	SRRM2
Q96EK6	Q96EK6	Glucosamine 6-phosphate N-acetyltransferase	GNPNAT1
P12109	P12109	Collagen alpha-1(VI) chain	COL6A1
Q5TFE4	Q5TFE4	5-nucleotidase domain-containing protein 1	NT5DC1
P14923	P14923	Junction plakoglobin	JUP
Q9H4A4	Q9H4A4	Aminopeptidase B	RNPEP
P62191	P62191	26S protease regulatory subunit 4	PSMC1
Q9Y5L4	Q9Y5L4	Mitochondrial import inner membrane translocase subunit Tim13	TIMM13
P35520;P0DN79	P35520;P0DN79	Cystathionine beta-synthase	CBS
Q8TDQ7	Q8TDQ7	Glucosamine-6-phosphate isomerase 2	GNPDA2
O00462	O00462	Beta-mannosidase	MANBA
Q9UBQ6	Q9UBQ6	Exostosin-like 2;Processed exostosin-like 2	EXTL2
O75822	O75822	Eukaryotic translation initiation factor 3 subunit J	EIF3J
Q6P1N9	Q6P1N9	Putative deoxyribonuclease TATDN1	TATDN1
Q9H3G5	Q9H3G5	Probable serine carboxypeptidase CPVL	CPVL
Q14011	Q14011	Cold-inducible RNA-binding protein	CIRBP
Q92747	Q92747	Actin-related protein 2/3 complex subunit 1A	ARPC1A
Q9UNS2	Q9UNS2	COP9 signalosome complex subunit 3	COPS3
Q06210	Q06210	Glutamine--fructose-6-phosphate aminotransferase [isomerizing] 1	GFPT1
P54577	P54577	Tyrosine--tRNA ligase, cytoplasmic;Tyrosine--tRNA ligase, cytoplasmic, N-terminally processed	YARS
Q15121	Q15121	Astrocytic phosphoprotein PEA-15	PEA15
Q86U42	Q86U42	Polyadenylate-binding protein 2	PABPN1
Q01844	Q01844	RNA-binding protein EWS	EWSR1
Q15424;Q14151	Q15424	Scaffold attachment factor B1	SAFB
P05026	P05026	Sodium/potassium-transporting ATPase subunit beta-1	ATP1B1
Q96CX2	Q96CX2	BTB/POZ domain-containing protein KCTD12	KCTD12
P02458	P02458	Collagen alpha-1(II) chain;Collagen alpha-1(II) chain;Chondrocalcin	COL2A1
O14657	O14657	Torsin-1B	TOR1B
P15374	P15374	Ubiquitin carboxyl-terminal hydrolase isozyme L3	UCHL3
O00231	O00231	26S proteasome non-ATPase regulatory subunit 11	PSMD11
P48444	P48444	Coatomer subunit delta	ARCN1
Q15024	Q15024	Exosome complex component RRP42	EXOSC7
Q01581;P54868	Q01581	Hydroxymethylglutaryl-CoA synthase, cytoplasmic	HMGCS1
P34896	P34896	Serine hydroxymethyltransferase, cytosolic	SHMT1
P15289	P15289	Arylsulfatase A;Arylsulfatase A component B;Arylsulfatase A component C	ARSA
P27694	P27694	Replication protein A 70 kDa DNA-binding subunit;Replication protein A 70 kDa DNA-binding subunit, N-terminally processed	RPA1
Q6P2Q9	Q6P2Q9	Pre-mRNA-processing-splicing factor 8	PRPF8
Q00688	Q00688	Peptidyl-prolyl cis-trans isomerase FKBP3	FKBP3
Q9NQ79	Q9NQ79	Cartilage acidic protein 1	CRTAC1
O95881	O95881	Thioredoxin domain-containing protein 12	TXNDC12
P46779	P46779	60S ribosomal protein L28	RPL28
Q53GS9	Q53GS9	U4/U6.U5 tri-snRNP-associated protein 2	USP39
P10155	P10155	60 kDa SS-A/Ro ribonucleoprotein	TROVE2
P60891;P11908;P21108	P60891;P11908;P21108	Ribose-phosphate pyrophosphokinase 1;Ribose-phosphate pyrophosphokinase 2;Ribose-phosphate pyrophosphokinase 3	PRPS1;PRPS2;PRPS1L1
P82970	P82970	High mobility group nucleosome-binding domain-containing protein 5	HMGN5
P61764	P61764	Syntaxin-binding protein 1	STXBP1
Q13275	Q13275	Semaphorin-3F	SEMA3F
P35052	P35052	Glypican-1;Secreted glypican-1	GPC1
Q9UBB4	Q9UBB4	Ataxin-10	ATXN10
Q9NQW7	Q9NQW7	Xaa-Pro aminopeptidase 1	XPNPEP1
P13804	P13804	Electron transfer flavoprotein subunit alpha, mitochondrial	ETFA
Q12931	Q12931	Heat shock protein 75 kDa, mitochondrial	TRAP1
Q15637	Q15637	Splicing factor 1	SF1
O15143	O15143	Actin-related protein 2/3 complex subunit 1B	ARPC1B
P17980	P17980	26S protease regulatory subunit 6A	PSMC3
P48163	P48163	NADP-dependent malic enzyme	ME1
P30419	P30419	Glycylpeptide N-tetradecanoyltransferase 1	NMT1
Q96G03	Q96G03	Phosphoglucomutase-2	PGM2
Q99627	Q99627	COP9 signalosome complex subunit 8	COPS8
Q86SF2	Q86SF2	N-acetylgalactosaminyltransferase 7	GALNT7
Q9BQ67	Q9BQ67	Glutamate-rich WD repeat-containing protein 1	GRWD1
P63010;Q10567	P63010;Q10567	AP-2 complex subunit beta;AP-1 complex subunit beta-1	AP2B1;AP1B1
Q9BSJ8	Q9BSJ8	Extended synaptotagmin-1	ESYT1
P08243	P08243	Asparagine synthetase [glutamine-hydrolyzing]	ASNS
Q53H96	Q53H96	Pyrroline-5-carboxylate reductase 3	PYCRL
Q15843	Q15843	NEDD8	NEDD8
P49915	P49915	GMP synthase [glutamine-hydrolyzing]	GMPS
O95831	O95831	Apoptosis-inducing factor 1, mitochondrial	AIFM1
P46109	P46109	Crk-like protein	CRKL
Q9UJU6	Q9UJU6	Drebrin-like protein	DBNL
Q9BYT8	Q9BYT8	Neurolysin, mitochondrial	NLN
P53004	P53004	Biliverdin reductase A	BLVRA
P17936	P17936	Insulin-like growth factor-binding protein 3	IGFBP3
Q9NYL9	Q9NYL9	Tropomodulin-3	TMOD3
O95399	O95399	Urotensin-2	UTS2
Q15436;Q15437	Q15436	Protein transport protein Sec23A	SEC23A
P14735	P14735	Insulin-degrading enzyme	IDE
Q8WVJ2	Q8WVJ2	NudC domain-containing protein 2	NUDCD2
Q9Y224	Q9Y224	UPF0568 protein C14orf166	C14orf166
P20340;Q9NRW1;Q14964	P20340;Q9NRW1;Q14964	Ras-related protein Rab-6A;Ras-related protein Rab-6B;Ras-related protein Rab-39A	RAB6A;RAB6B;RAB39A
Q99471	Q99471	Prefoldin subunit 5	PFDN5
P61513	P61513	60S ribosomal protein L37a	RPL37A
Q92945	Q92945	Far upstream element-binding protein 2	KHSRP
P81605	P81605	Dermcidin;Survival-promoting peptide;DCD-1	DCD
O00154	O00154	Cytosolic acyl coenzyme A thioester hydrolase	ACOT7
O60925	O60925	Prefoldin subunit 1	PFDN1
Q86UP2	Q86UP2	Kinectin	KTN1
Q99784	Q99784	Noelin	OLFM1
P54707	P54707	Potassium-transporting ATPase alpha chain 2	ATP12A
Q9Y294	Q9Y294	Histone chaperone ASF1A	ASF1A
P49419	P49419	Alpha-aminoadipic semialdehyde dehydrogenase	ALDH7A1
P52943	P52943	Cysteine-rich protein 2	CRIP2
Q15417	Q15417	Calponin-3	CNN3
Q93045	Q93045	Stathmin-2	STMN2
P30740	P30740	Leukocyte elastase inhibitor	SERPINB1
P29218	P29218	Inositol monophosphatase 1	IMPA1
O75643	O75643	U5 small nuclear ribonucleoprotein 200 kDa helicase	SNRNP200
Q96C90	Q96C90	Protein phosphatase 1 regulatory subunit 14B	PPP1R14B
P28161	P28161	Glutathione S-transferase Mu 2	GSTM2
O43583	O43583	Density-regulated protein	DENR
P35754	P35754	Glutaredoxin-1	GLRX
Q00577	Q00577	Transcriptional activator protein Pur-alpha	PURA
Q9Y2S6	Q9Y2S6	Translation machinery-associated protein 7	TMA7
Q9BT78	Q9BT78	COP9 signalosome complex subunit 4	COPS4
Q01813	Q01813	ATP-dependent 6-phosphofructokinase, platelet type	PFKP
P36405	P36405	ADP-ribosylation factor-like protein 3	ARL3
P62333	P62333	26S protease regulatory subunit 10B	PSMC6
P10644	P10644	cAMP-dependent protein kinase type I-alpha regulatory subunit;cAMP-dependent protein kinase type I-alpha regulatory subunit, N-terminally processed	PRKAR1A
P48739	P48739	Phosphatidylinositol transfer protein beta isoform	PITPNB
Q96P70	Q96P70	Importin-9	IPO9
Q9Y285	Q9Y285	Phenylalanine--tRNA ligase alpha subunit	FARSA
P33908	P33908	Mannosyl-oligosaccharide 1,2-alpha-mannosidase IA	MAN1A1
Q01658	Q01658	Protein Dr1	DR1
P42694	P42694	Probable helicase with zinc finger domain	HELZ
P30837	P30837	Aldehyde dehydrogenase X, mitochondrial	ALDH1B1
Q12874	Q12874	Splicing factor 3A subunit 3	SF3A3
Q8NHP8	Q8NHP8	Putative phospholipase B-like 2;Putative phospholipase B-like 2 32 kDa form;Putative phospholipase B-like 2 45 kDa form	PLBD2
Q9NP97	Q9NP97	Dynein light chain roadblock-type 1	DYNLRB1
Q9NR30	Q9NR30	Nucleolar RNA helicase 2	DDX21
Q9NQP4	Q9NQP4	Prefoldin subunit 4	PFDN4
P41227	P41227	N-alpha-acetyltransferase 10	NAA10
O75607	O75607	Nucleoplasmin-3	NPM3
P40121	P40121	Macrophage-capping protein	CAPG
Q13630	Q13630	GDP-L-fucose synthase	TSTA3
O95757	O95757	Heat shock 70 kDa protein 4L	HSPA4L
Q03252	Q03252	Lamin-B2	LMNB2
P17812;Q9NRF8	P17812	CTP synthase 1	CTPS1
P46459	P46459	Vesicle-fusing ATPase	NSF
Q9GZS3	Q9GZS3	WD repeat-containing protein 61;WD repeat-containing protein 61, N-terminally processed	WDR61
Q14152	Q14152	Eukaryotic translation initiation factor 3 subunit A	EIF3A
P30626	P30626	Sorcin	SRI
P00488	P00488	Coagulation factor XIII A chain	F13A1
Q96JB1	Q96JB1	Dynein heavy chain 8, axonemal	DNAH8
Q9NYQ8	Q9NYQ8	Protocadherin Fat 2	FAT2
P28062	P28062	Proteasome subunit beta type-8	PSMB8
P35606	P35606	Coatomer subunit beta	COPB2
P45974	P45974	Ubiquitin carboxyl-terminal hydrolase 5	USP5
P37108	P37108	Signal recognition particle 14 kDa protein	SRP14
Q8NC69	Q8NC69	BTB/POZ domain-containing protein KCTD6	KCTD6
Q9NX55	Q9NX55	Huntingtin-interacting protein K	HYPK
Q9UHV9	Q9UHV9	Prefoldin subunit 2	PFDN2
O43242	O43242	26S proteasome non-ATPase regulatory subunit 3	PSMD3
O43505	O43505	Beta-1,4-glucuronyltransferase 1	B4GAT1
O15078	O15078	Centrosomal protein of 290 kDa	CEP290
Q13620;Q13619	Q13620;Q13619	Cullin-4B;Cullin-4A	CUL4B;CUL4A
Q96D15	Q96D15	Reticulocalbin-3	RCN3
P31689	P31689	DnaJ homolog subfamily A member 1	DNAJA1
Q9GZZ1	Q9GZZ1	N-alpha-acetyltransferase 50	NAA50
P30530	P30530	Tyrosine-protein kinase receptor UFO	AXL
Q3ZCM7	Q3ZCM7	Tubulin beta-8 chain	TUBB8
Q9H074	Q9H074	Polyadenylate-binding protein-interacting protein 1	PAIP1
Q9UNZ2	Q9UNZ2	NSFL1 cofactor p47	NSFL1C
Q9Y4Y9	Q9Y4Y9	U6 snRNA-associated Sm-like protein LSm5	LSM5
Q14194;Q14117	Q14194	Dihydropyrimidinase-related protein 1	CRMP1
Q14847	Q14847	LIM and SH3 domain protein 1	LASP1
Q9H173	Q9H173	Nucleotide exchange factor SIL1	SIL1
P82979	P82979	SAP domain-containing ribonucleoprotein	SARNP
Q6ZRP7	Q6ZRP7	Sulfhydryl oxidase 2	QSOX2
O00571;O15523	O00571;O15523	ATP-dependent RNA helicase DDX3X;ATP-dependent RNA helicase DDX3Y	DDX3X;DDX3Y
Q13951	Q13951	Core-binding factor subunit beta	CBFB
P62195;Q8NB90	P62195;Q8NB90	26S protease regulatory subunit 8;Spermatogenesis-associated protein 5	PSMC5;SPATA5
Q15102	Q15102	Platelet-activating factor acetylhydrolase IB subunit gamma	PAFAH1B3
Q13561	Q13561	Dynactin subunit 2	DCTN2
Q13547;Q92769	Q13547;Q92769	Histone deacetylase 1;Histone deacetylase 2	HDAC1;HDAC2
P51665	P51665	26S proteasome non-ATPase regulatory subunit 7	PSMD7
P04350;A6NNZ2;Q9H4B7;CON__ENSEMBL:ENSBTAP00000025008	P04350	Tubulin beta-4A chain	TUBB4A
O43592	O43592	Exportin-T	XPOT
Q712K3	Q712K3	Ubiquitin-conjugating enzyme E2 R2	UBE2R2
O96019	O96019	Actin-like protein 6A	ACTL6A
Q96CN7	Q96CN7	Isochorismatase domain-containing protein 1	ISOC1
Q9NX46	Q9NX46	Poly(ADP-ribose) glycohydrolase ARH3	ADPRHL2
Q99519	Q99519	Sialidase-1	NEU1
O43847	O43847	Nardilysin	NRD1
P58107	P58107	Epiplakin	EPPK1
P09661	P09661	U2 small nuclear ribonucleoprotein A	SNRPA1
Q9UI30	Q9UI30	Multifunctional methyltransferase subunit TRM112-like protein	TRMT112
Q99985	Q99985	Semaphorin-3C	SEMA3C
Q14166	Q14166	Tubulin--tyrosine ligase-like protein 12	TTLL12
P61457	P61457	Pterin-4-alpha-carbinolamine dehydratase	PCBD1
O60739	O60739	Eukaryotic translation initiation factor 1b	EIF1B
P35998	P35998	26S protease regulatory subunit 7	PSMC2
Q7RTV0	Q7RTV0	PHD finger-like domain-containing protein 5A	PHF5A
P21359	P21359	Neurofibromin;Neurofibromin truncated	NF1
O00170	O00170	AH receptor-interacting protein	AIP
P42677	P42677	40S ribosomal protein S27	RPS27
Q14566	Q14566	DNA replication licensing factor MCM6	MCM6
Q9H098	Q9H098	Protein FAM107B	FAM107B
P04066	P04066	Tissue alpha-L-fucosidase	FUCA1
Q13642	Q13642	Four and a half LIM domains protein 1	FHL1
Q9GZL7	Q9GZL7	Ribosome biogenesis protein WDR12	WDR12
Q9BWS9	Q9BWS9	Chitinase domain-containing protein 1	CHID1
O00300	O00300	Tumor necrosis factor receptor superfamily member 11B	TNFRSF11B
P48506	P48506	Glutamate--cysteine ligase catalytic subunit	GCLC
Q9Y6E2	Q9Y6E2	Basic leucine zipper and W2 domain-containing protein 2	BZW2
Q9UMY4	Q9UMY4	Sorting nexin-12	SNX12
P52888	P52888	Thimet oligopeptidase	THOP1
Q13907	Q13907	Isopentenyl-diphosphate Delta-isomerase 1	IDI1
P63167;Q96FJ2	P63167;Q96FJ2	Dynein light chain 1, cytoplasmic;Dynein light chain 2, cytoplasmic	DYNLL1;DYNLL2
O95670;O75348	O95670;O75348	V-type proton ATPase subunit G 2;V-type proton ATPase subunit G 1	ATP6V1G2;ATP6V1G1
Q9NSD9	Q9NSD9	Phenylalanine--tRNA ligase beta subunit	FARSB
P10124	P10124	Serglycin	SRGN
Q9UHD8	Q9UHD8	Septin-9	2023-09-09
Q6PKG0	Q6PKG0	La-related protein 1	LARP1
P48507	P48507	Glutamate--cysteine ligase regulatory subunit	GCLM
P62633	P62633	Cellular nucleic acid-binding protein	CNBP
Q99460	Q99460	26S proteasome non-ATPase regulatory subunit 1	PSMD1
P55735	P55735	Protein SEC13 homolog	SEC13
O43684	O43684	Mitotic checkpoint protein BUB3	BUB3
Q5VYK3	Q5VYK3	Proteasome-associated protein ECM29 homolog	ECM29
Q9BRP8	Q9BRP8	Partner of Y14 and mago	WIBG
P69905	P69905	Hemoglobin subunit alpha	HBA1
P50579	P50579	Methionine aminopeptidase 2	METAP2
O15511	O15511	Actin-related protein 2/3 complex subunit 5	ARPC5
Q14195	Q14195	Dihydropyrimidinase-related protein 3	DPYSL3
Q6ZUK4	Q6ZUK4	Transmembrane protein 26	TMEM26
Q8NCY6	Q8NCY6	Myb/SANT-like DNA-binding domain-containing protein 4	MSANTD4
Q96NW4	Q96NW4	Ankyrin repeat domain-containing protein 27	ANKRD27
Q9UBQ7	Q9UBQ7	Glyoxylate reductase/hydroxypyruvate reductase	GRHPR
P49591	P49591	Serine--tRNA ligase, cytoplasmic	SARS
Q13310	Q13310	Polyadenylate-binding protein 4	PABPC4
Q01130	Q01130	Serine/arginine-rich splicing factor 2	SRSF2
P08237	P08237	ATP-dependent 6-phosphofructokinase, muscle type	PFKM
P01137	P01137	Transforming growth factor beta-1;Latency-associated peptide	TGFB1
Q13501	Q13501	Sequestosome-1	SQSTM1
P62910	P62910	60S ribosomal protein L32	RPL32
Q14839;Q12873;Q8TDI0	Q14839;Q12873;Q8TDI0	Chromodomain-helicase-DNA-binding protein 4;Chromodomain-helicase-DNA-binding protein 3;Chromodomain-helicase-DNA-binding protein 5	CHD4;CHD3;CHD5
Q5VW32	Q5VW32	BRO1 domain-containing protein BROX	BROX
Q6UWN8	Q6UWN8	Serine protease inhibitor Kazal-type 6	SPINK6
P05114	P05114	Non-histone chromosomal protein HMG-14	HMGN1
